# Supplementary material for: Dopamine-modified cobalt spinel nanoparticles as an active catalyst for the acidic oxygen evolution reaction
Source: Royal Society of Chemistry journal article supplement (doi:10.1039/d4dt00915k), 2024-01-01
Supplement: d4dt00915k1.pdf [file d4dt00915k1.pdf]

## Electronic Supplementary Information

# Dopamine-modified cobalt spinel nanoparticles as active catalysts for acidic oxygen evolution reaction

Zhengle Chen<sup>a</sup>, Zhiqing Yang<sup>a</sup>, Xinyuan Li<sup>a</sup>, Longhua Li<sup>a,\*</sup> and Hua Lin<sup>b,\*</sup>

<sup>a</sup>*School of Chemistry and Chemical Engineering, Jiangsu University, Zhenjiang 212013, P. R. China*

<sup>b</sup>*State Key Laboratory of Structural Chemistry, Fujian Institute of Research on the Structure of Matter, Chinese Academy of Sciences, Fuzhou 350002, P. R. China*

Fig. S1 Scheme of the experimental details.

Fig. S2 XRD for Co<sub>3</sub>O<sub>4</sub>/CP, Co<sub>3</sub>O<sub>4</sub>@NC/CP-0.05 5mM.

Fig. S3 SEM for Co<sub>3</sub>O<sub>4</sub>/CP, Co<sub>3</sub>O<sub>4</sub>@NC/CP-2.5mM.

Fig. S4 TEM for Co<sub>3</sub>O<sub>4</sub>/CP, Co<sub>3</sub>O<sub>4</sub>@NC/CP-0.5mM and 2.5mM.

Fig. S5 C1s XPS for Co<sub>3</sub>O<sub>4</sub>@NC/CP-0.5mM, 1.5mM and 2.5mM.

Fig. S6 LSV for Co<sub>3</sub>O<sub>4</sub>/CP, Co<sub>3</sub>O<sub>4</sub>@NC/CP-0.05 5mM.

Fig. S7 LSV of different content of IrO<sub>2</sub>.

Fig. S8 LSV for commercial IrO<sub>2</sub> (the best) and Co<sub>3</sub>O<sub>4</sub>@NC.

Fig. S9 Normalized LSV curves according to the Co<sub>3</sub>O<sub>4</sub> ECSA

Fig. S10 Isothermal adsorption curves of Co<sub>3</sub>O<sub>4</sub>@NC/CP-0.5mM and Co<sub>3</sub>O<sub>4</sub>/CP

Fig. S11 CV and C<sub>dl</sub> for Co<sub>3</sub>O<sub>4</sub>/CP, Co<sub>3</sub>O<sub>4</sub>@NC/CP-0.05 5mM.

Fig. S12 Tafel slop of Co<sub>3</sub>O<sub>4</sub>/CP, Co<sub>3</sub>O<sub>4</sub>@NC/CP-0.05 5mM.

Fig. S13 EIS for Co<sub>3</sub>O<sub>4</sub>@NC/CP-0.5mM, 1.5mM and 2.5mM.

Fig. S14 Fitting R<sub>s</sub>, R<sub>ct</sub> and C<sub>s</sub> for Co<sub>3</sub>O<sub>4</sub>@NC/CP-0.5mM, 1.5mM and 2.5mM.

Fig. S15 In situ Raman spectra of the as-prepared catalysts during OER process

Fig. S16 The stability of in situ growth Co<sub>3</sub>O<sub>4</sub>@NC/CP-0.5mM and naphthol bonding Co<sub>3</sub>O<sub>4</sub>@NC-0.5mM.

Fig. S17 Five optimized atomic-configurations and their intermediates.

Fig. S18 Projected density of states (PDOS) and d band center of Co adsorption site.

Table S1 Calculated Gibbs energies of O<sub>2</sub>, H<sub>2</sub>, H<sub>2</sub>O and OH.

Table S2 Performance of different cobalt-based catalysts.

Table S3 Bader charges ( $e$ ) of carbonaceous component (CC) and the  $\text{Co}_3\text{O}_4$  component.

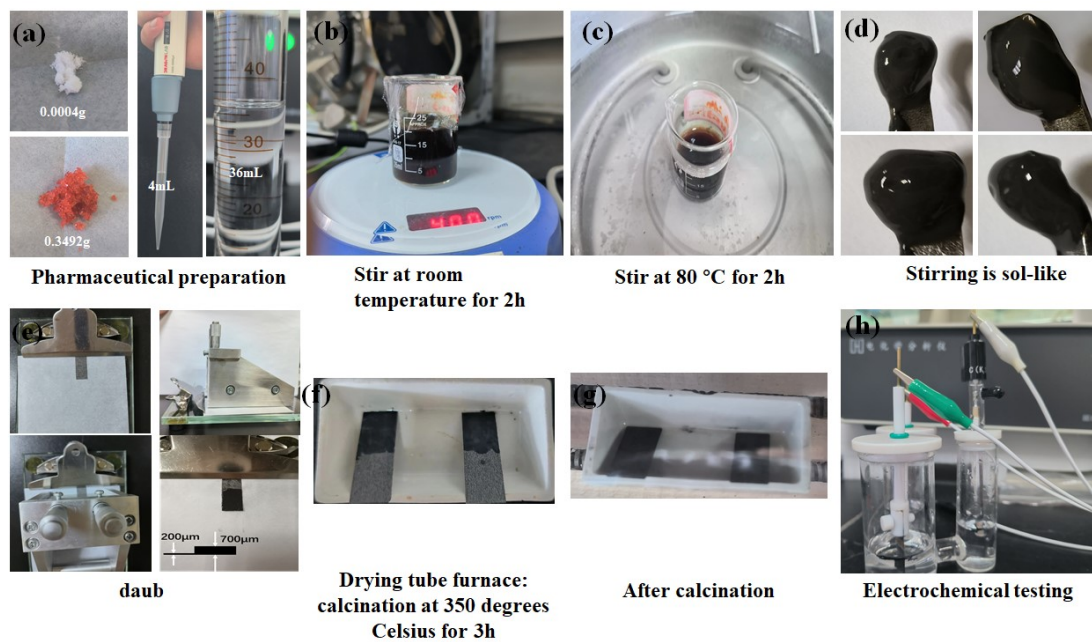

**Fig. S1** Experimental details

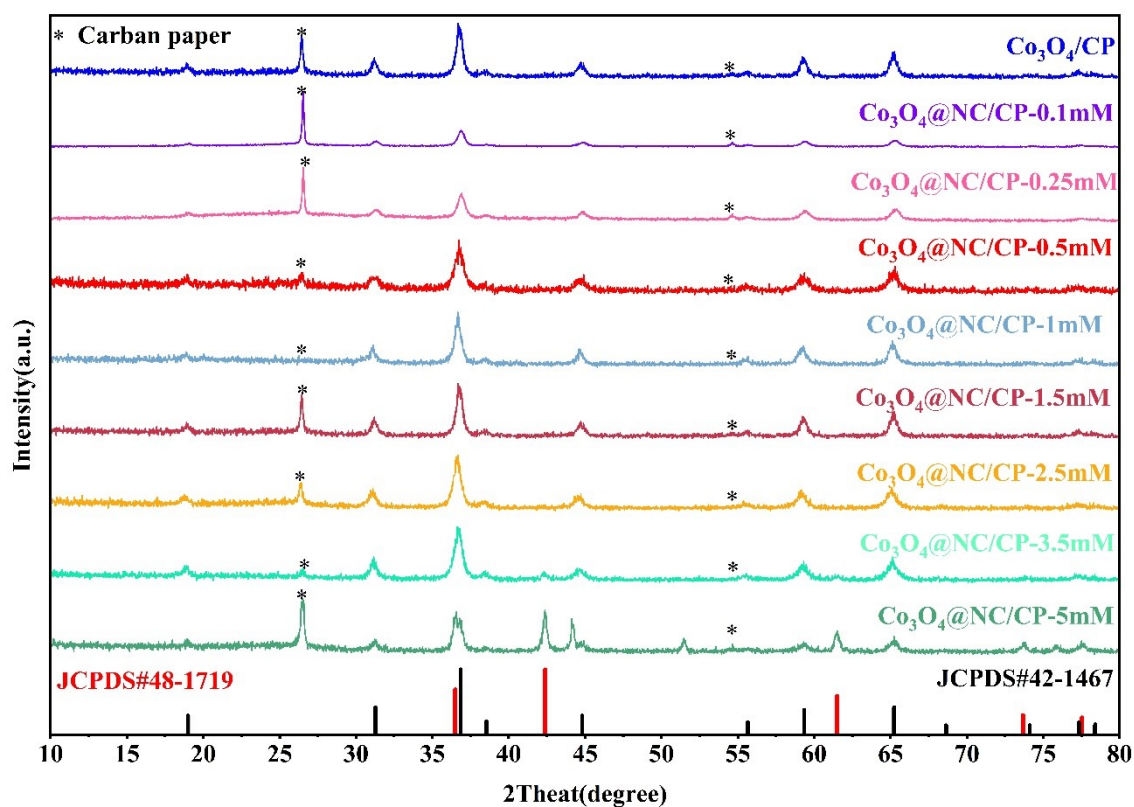

**Fig. S2** XRD of Co<sub>3</sub>O<sub>4</sub>/CP, Co<sub>3</sub>O<sub>4</sub>@NC/CP-0.25mM, Co<sub>3</sub>O<sub>4</sub>@NC/CP-0.5mM, Co<sub>3</sub>O<sub>4</sub>@NC/CP-1mM, Co<sub>3</sub>O<sub>4</sub>@NC/CP-1.5mM, Co<sub>3</sub>O<sub>4</sub>@NC/CP-2.5mM, Co<sub>3</sub>O<sub>4</sub>@NC/CP-3.5mM, and Co<sub>3</sub>O<sub>4</sub>@NC/CP-5mM. \* is the carbon paper, the black signals (JCPDS#42-1467) represent the spinel type of Co<sub>3</sub>O<sub>4</sub> structure and the red signals (JCPDS#48-1719) represent the CoO structure.

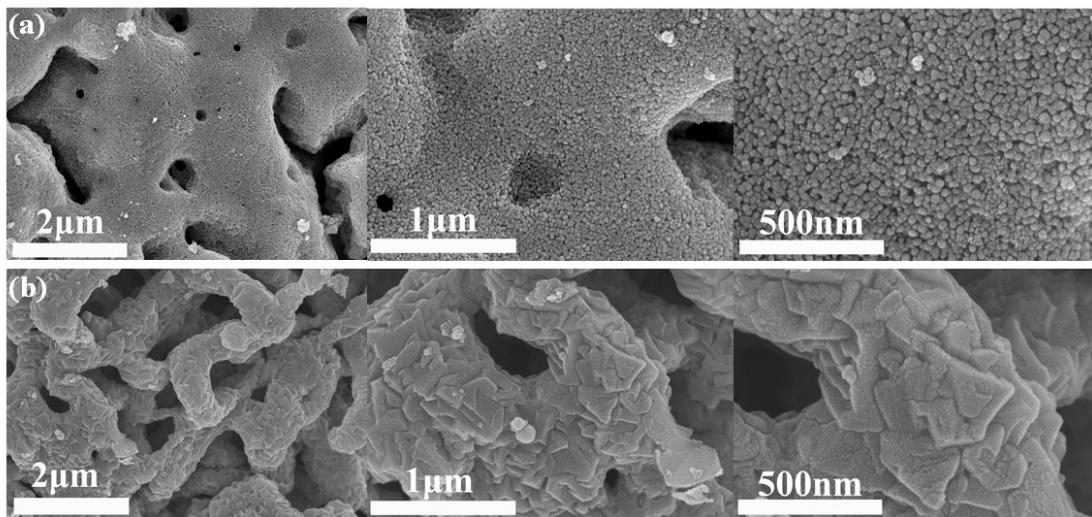

**Fig. S3** (a) SEM of  $\text{Co}_3\text{O}_4$ . (b) SEM of  $\text{Co}_3\text{O}_4$ @NC-2.5mM.

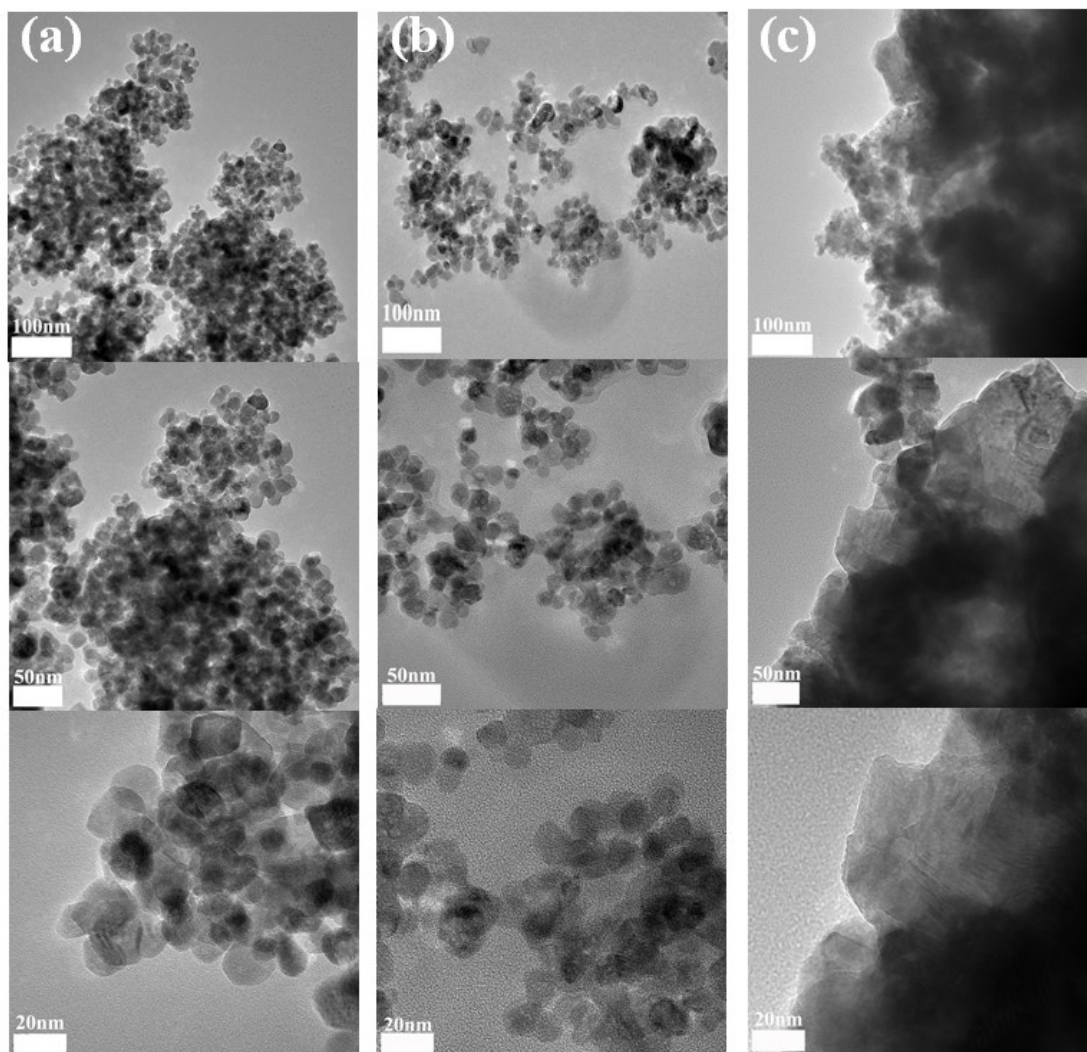

**Fig. S4** (a), (b), and (c) are the TEM of  $\text{Co}_3\text{O}_4@\text{NC}-0.5\text{mM}$ ,  $\text{Co}_3\text{O}_4$ , and  $\text{Co}_3\text{O}_4@\text{NC}-2.5\text{mM}$ , respectively.

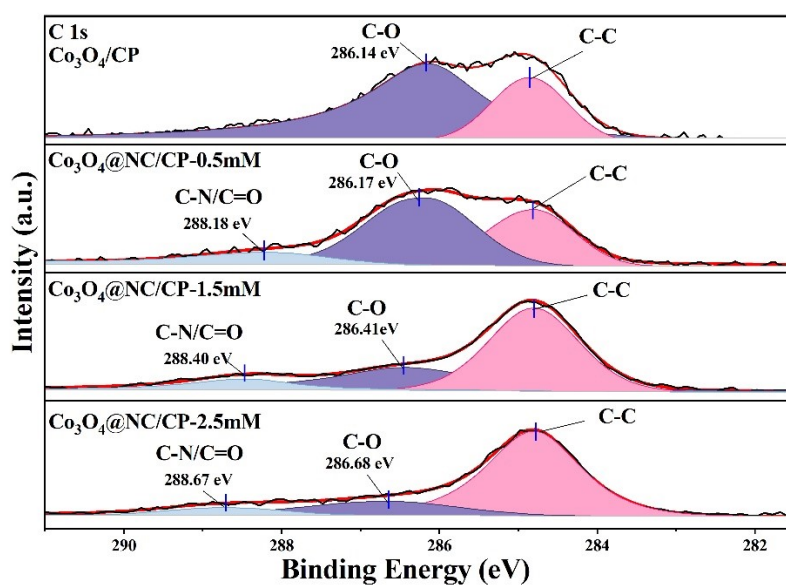

Fig. S5 C1s XPS spectra of  $\text{Co}_3\text{O}_4@NC$ -0.5mM, 1.5 and 2.5mM.

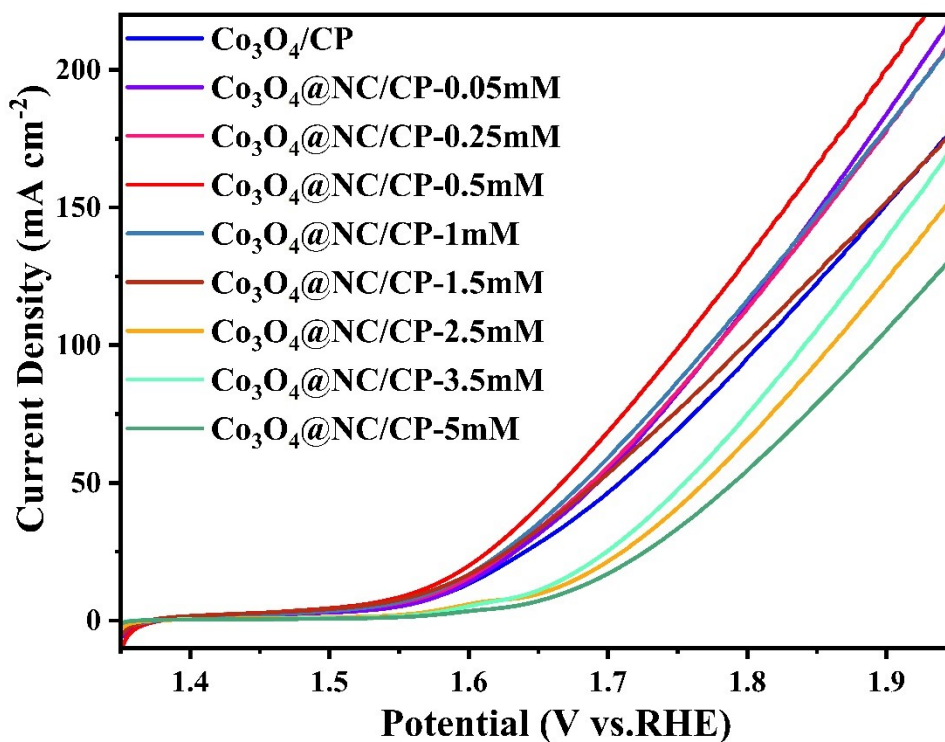

Fig. S6 LSV at different molar ratios for  $\text{Co}_3\text{O}_4/CP$ ,  $\text{Co}_3\text{O}_4@NC/CP$ -0.1mM,  $\text{Co}_3\text{O}_4@NC/CP$ -0.25mM,  $\text{Co}_3\text{O}_4@NC/CP$ -0.5mM,  $\text{Co}_3\text{O}_4@NC/CP$ -1mM,  $\text{Co}_3\text{O}_4@NC/CP$ -1.5mM,  $\text{Co}_3\text{O}_4@NC/CP$ -2.5mM,  $\text{Co}_3\text{O}_4@NC/CP$ -3.5mM, and  $\text{Co}_3\text{O}_4@NC/CP$ -5mM.

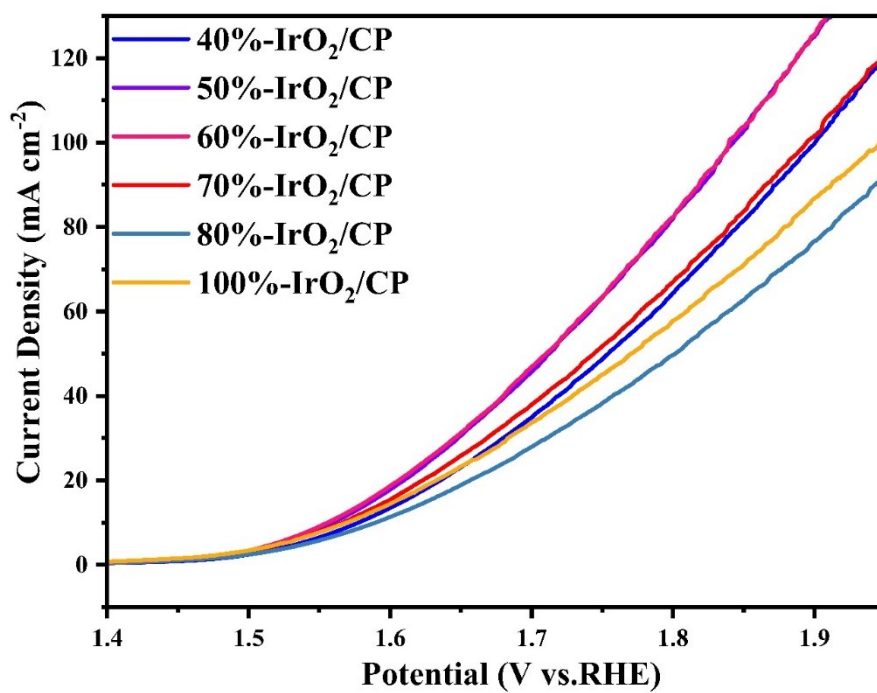

Fig. S7 LSV of different content of IrO<sub>2</sub>

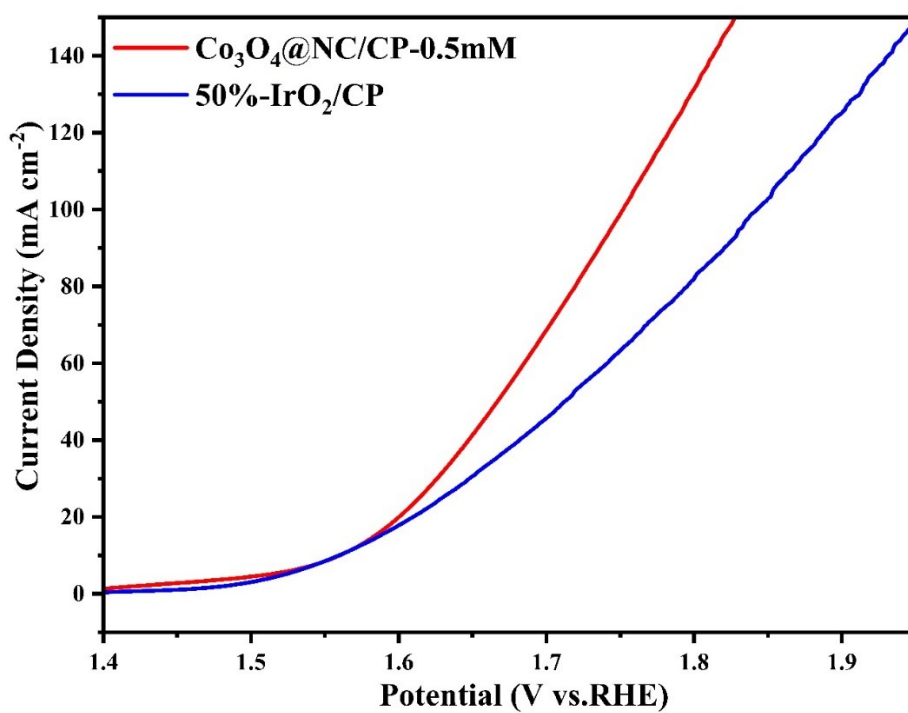

Fig. S8 Comparison of LSV for commercial IrO<sub>2</sub> (the best) and Co<sub>3</sub>O<sub>4</sub>@NC

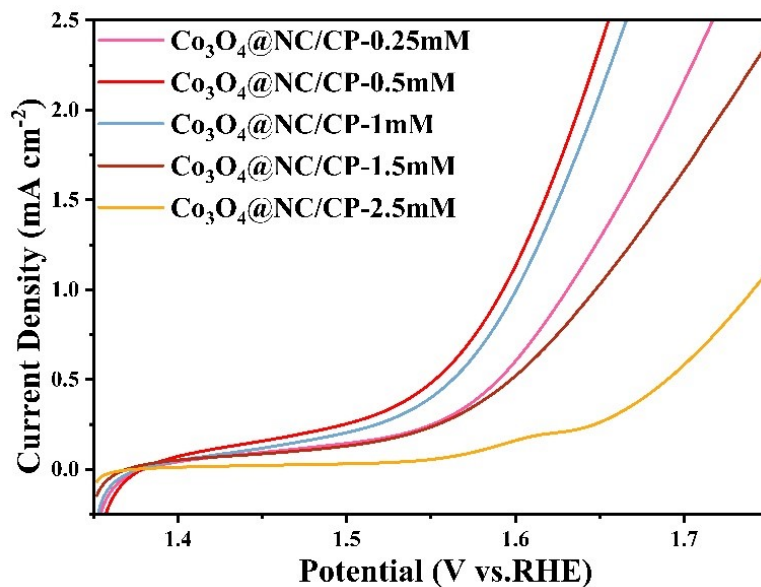

Fig. S9 LSV curves were normalized according to the  $\text{Co}_3\text{O}_4$  ECSA

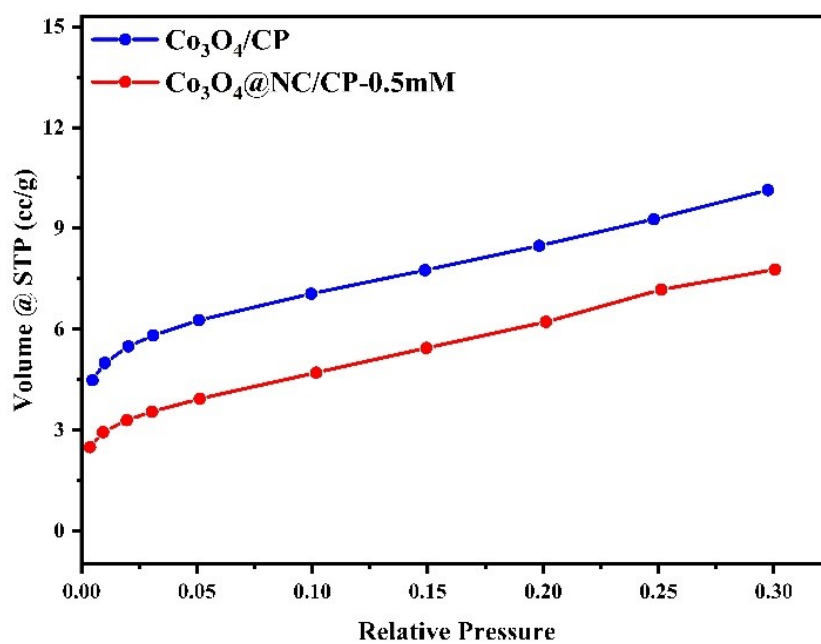

Fig. S10 Isothermal adsorption curves of  $\text{Co}_3\text{O}_4$ @NC/CP-0.5mM and  $\text{Co}_3\text{O}_4$ /CP



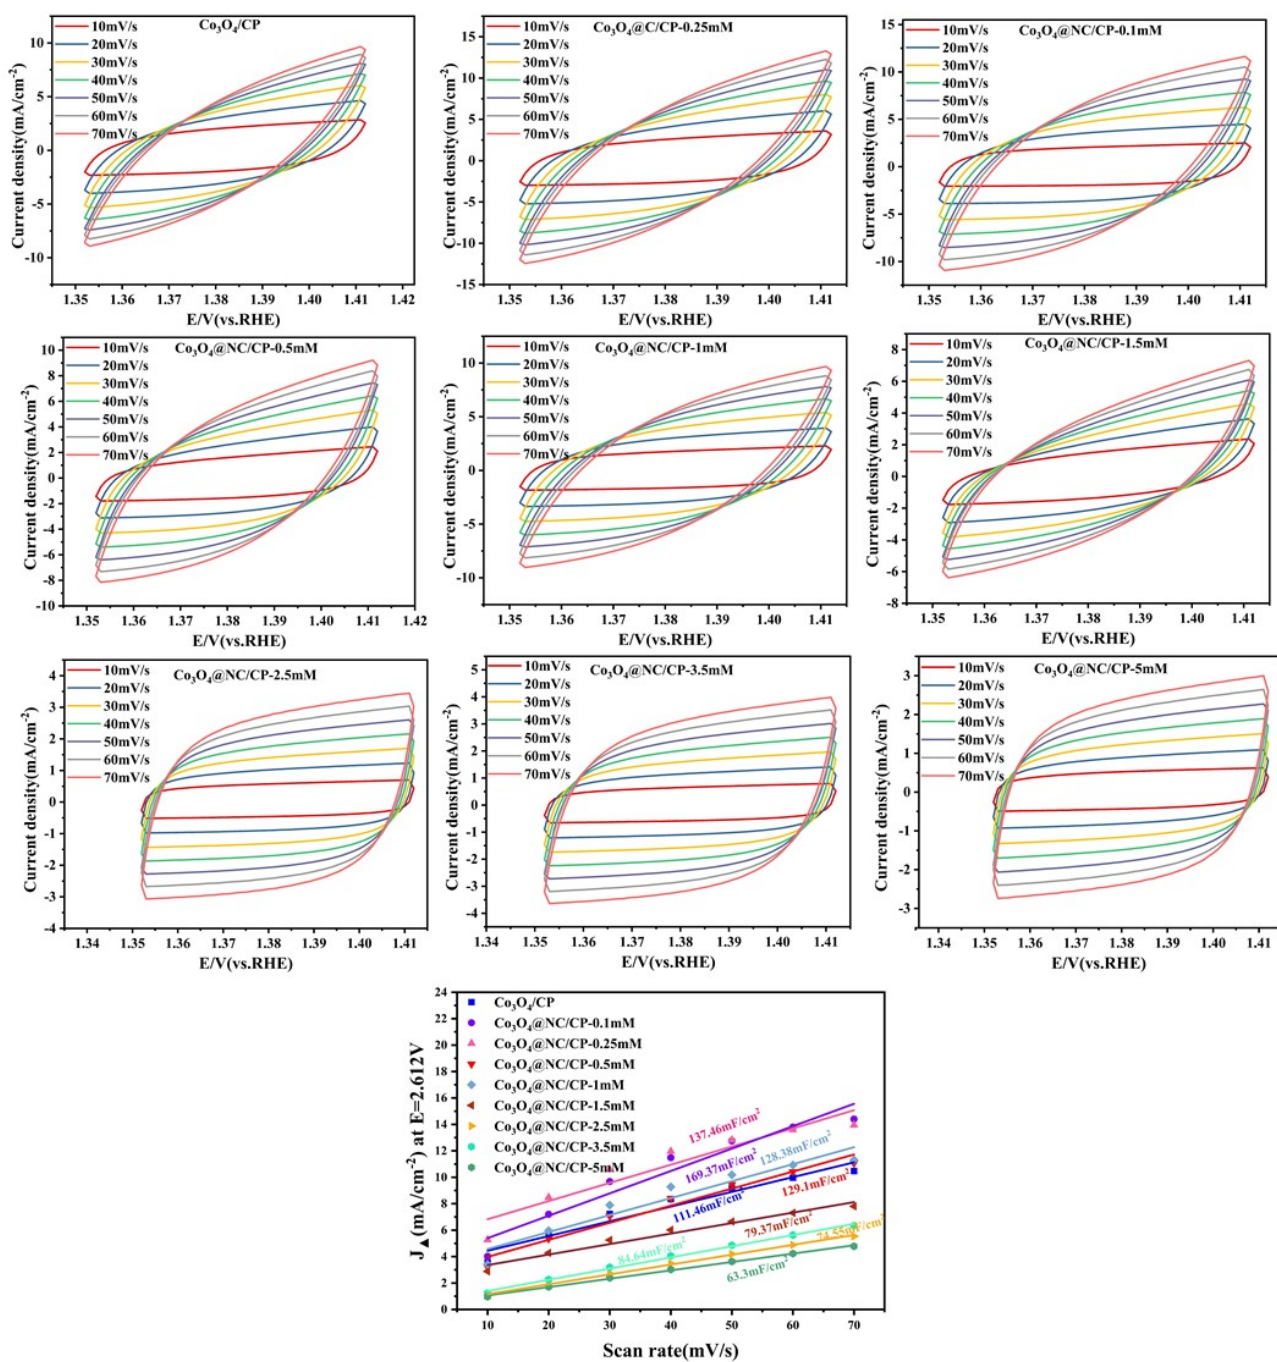

**Fig. S11** Cyclic voltammograms (CV) and double-layer capacitor ( $C_{dl}$ ) for  $\text{Co}_3\text{O}_4/\text{CP}$ ,  $\text{Co}_3\text{O}_4@/\text{NC}/\text{CP}-0.1\text{mM}$ ,  $\text{Co}_3\text{O}_4@/\text{NC}/\text{CP}-0.25\text{mM}$ ,  $\text{Co}_3\text{O}_4@/\text{NC}/\text{CP}-0.5\text{mM}$ ,  $\text{Co}_3\text{O}_4@/\text{NC}/\text{CP}-1\text{mM}$ ,  $\text{Co}_3\text{O}_4@/\text{NC}/\text{CP}-1.5\text{mM}$ ,  $\text{Co}_3\text{O}_4@/\text{NC}/\text{CP}-2.5\text{mM}$ ,  $\text{Co}_3\text{O}_4@/\text{NC}/\text{CP}-3.5\text{mM}$ , and  $\text{Co}_3\text{O}_4@/\text{NC}/\text{CP}-5\text{mM}$ .

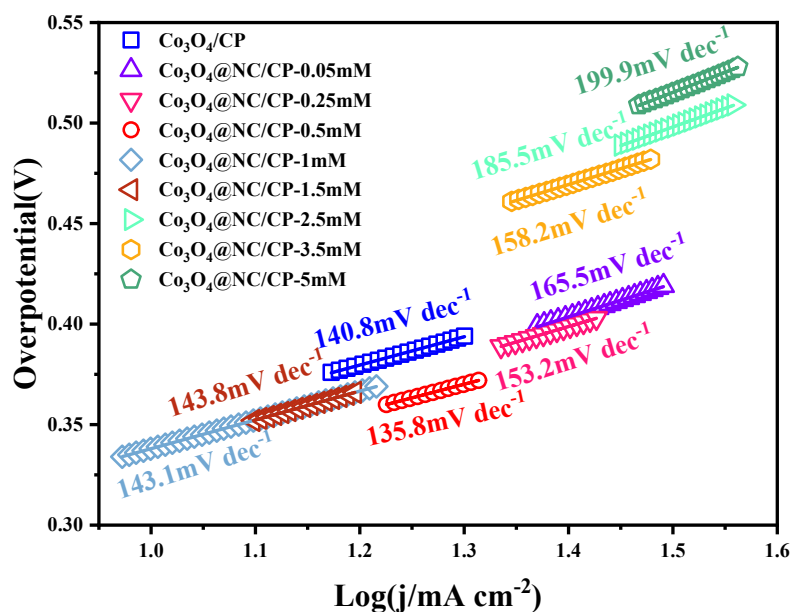

Fig. S12 Tafel slop of Co<sub>3</sub>O<sub>4</sub>/CP, Co<sub>3</sub>O<sub>4</sub>@NC/CP-0.05 5mM.

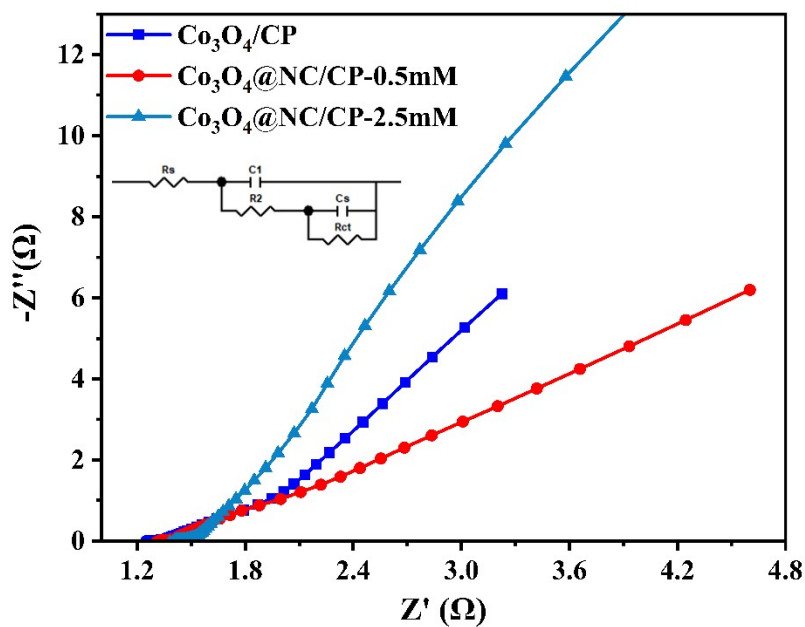

Fig. S13 Electrochemical impedance spectroscopy (EIS) for Co<sub>3</sub>O<sub>4</sub>/CP, Co<sub>3</sub>O<sub>4</sub>@NC/CP-0.5 and Co<sub>3</sub>O<sub>4</sub>@NC/CP-2.5mM.

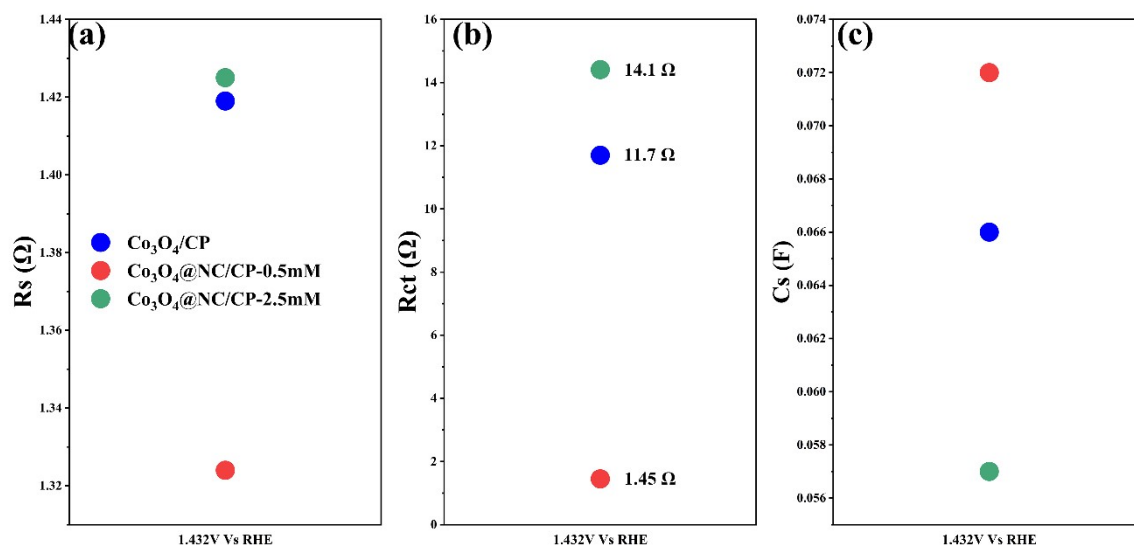

**Fig. S14** Fitted parameters from the above EIS: (a) Series resistance,  $R_s$ , (b) Charge transfer resistance,  $R_{ct}$  and (c) Surface capacitance,  $C_s$ .

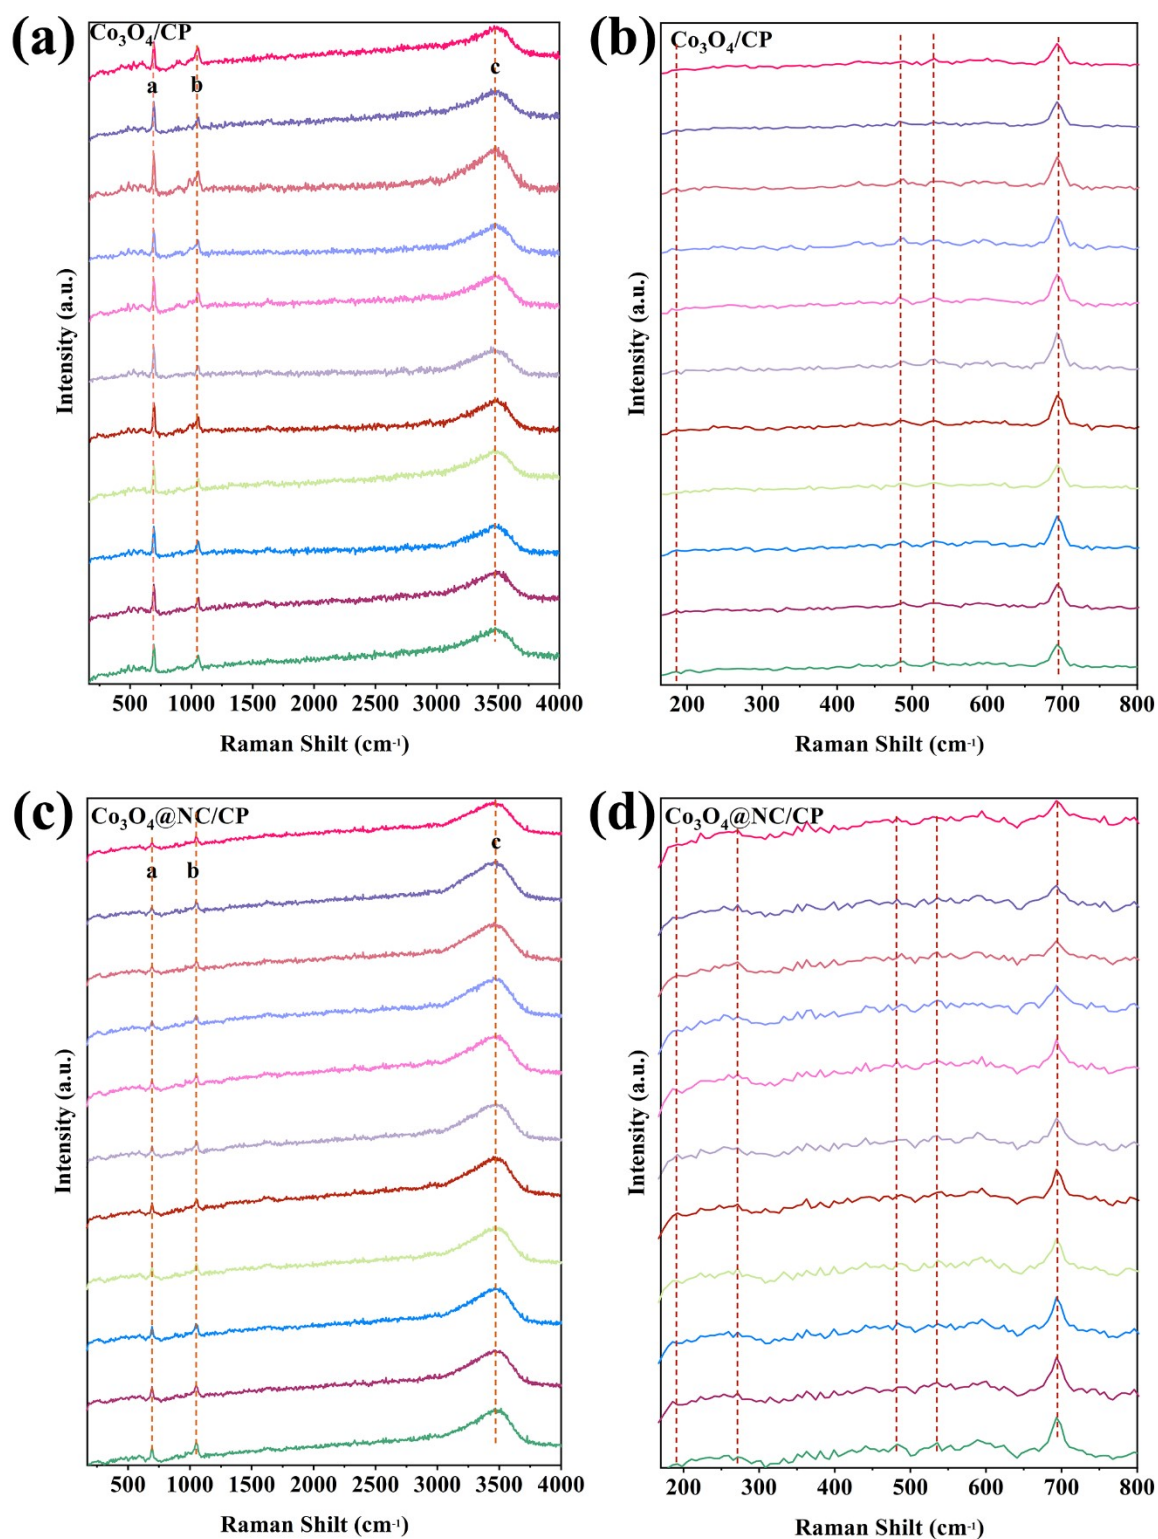

**Fig. S15** Time-dependent in situ Raman spectra of as-prepared catalysts during OER process by an applied voltage ( $10\text{mA cm}^{-2}$  constant current, step size 30s). (a), (b) in situ Raman spectra of  $\text{Co}_3\text{O}_4/\text{CP}$ . (c), (d) in situ Raman spectra of  $\text{Co}_3\text{O}_4@\text{NC}/\text{CP}$ -0.5mM. peak a is  $[\text{CoO}_6]$  octahedra:  $\sim 690\text{ cm}^{-1}$ ; peak b is  $\text{SO}_4^{2-}$ :  $\sim 1000\text{ cm}^{-1}$ ; and peak c is OH:  $\sim 3500\text{ cm}^{-1}$ ;  $[\text{CoO}_4]$  tetrahedra:  $\sim 196\text{ cm}^{-1}$

<sup>1</sup>; Co(OH)<sub>2</sub>: ~290 cm<sup>-1</sup>; Co-O bending and Co-O stretching in CoOOH: ~480 cm<sup>-1</sup> and ~520 cm<sup>-1</sup>, respectively.

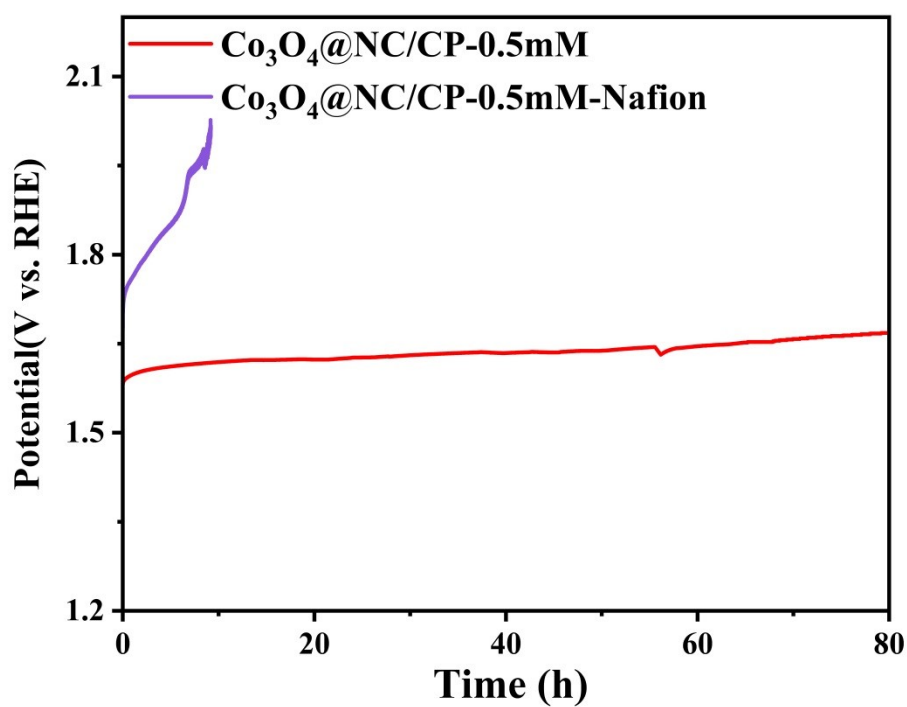

**Fig. S16** The stability of in situ growth Co<sub>3</sub>O<sub>4</sub>@NC/CP-0.5mM and naphthol bonding Co<sub>3</sub>O<sub>4</sub>@NC-0.5mM.

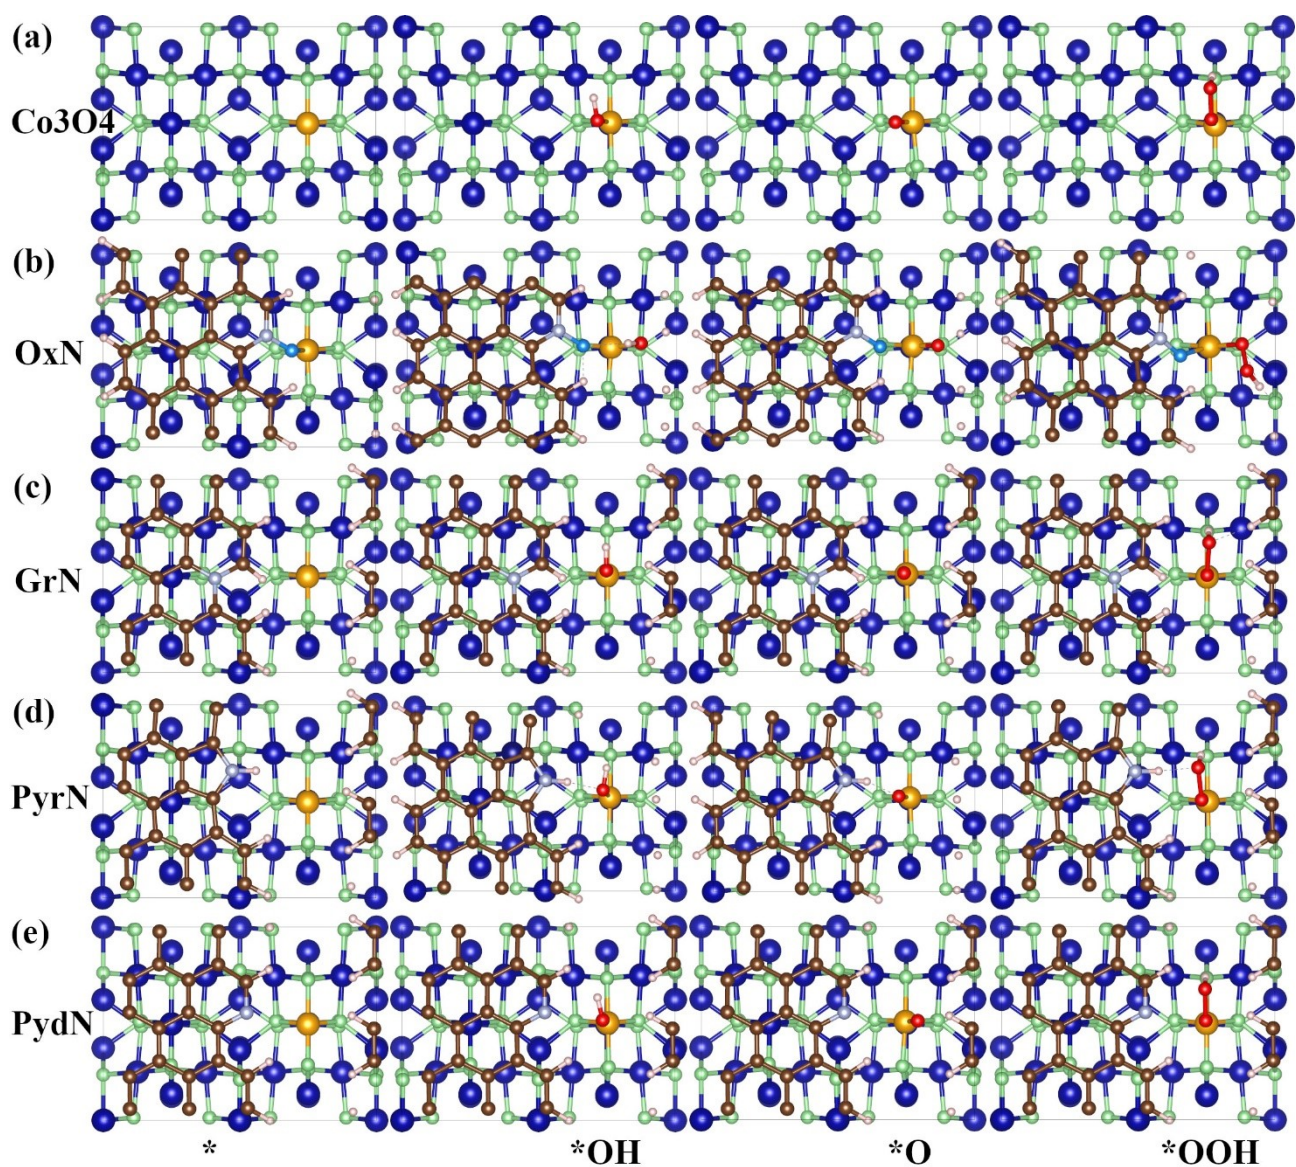

**Fig. S17** Optimized configurations of intermediates for (a) pure  $\text{Co}_3\text{O}_4(110)$ , (b) Oxidized N, (c) Graphitic N, (d) Pyrrolic N and (e) Pyridinic N carbonaceous components covered  $\text{Co}_3\text{O}_4$ . Orange: reactive cobalt site; blue: cobalt; lightgreen: oxygen of  $\text{Co}_3\text{O}_4$ ; red: oxygen of intermediates; dodgerblue: oxygen of NO group; brown: carbon; pink: hydrogen; and lightblue: nitrogen.

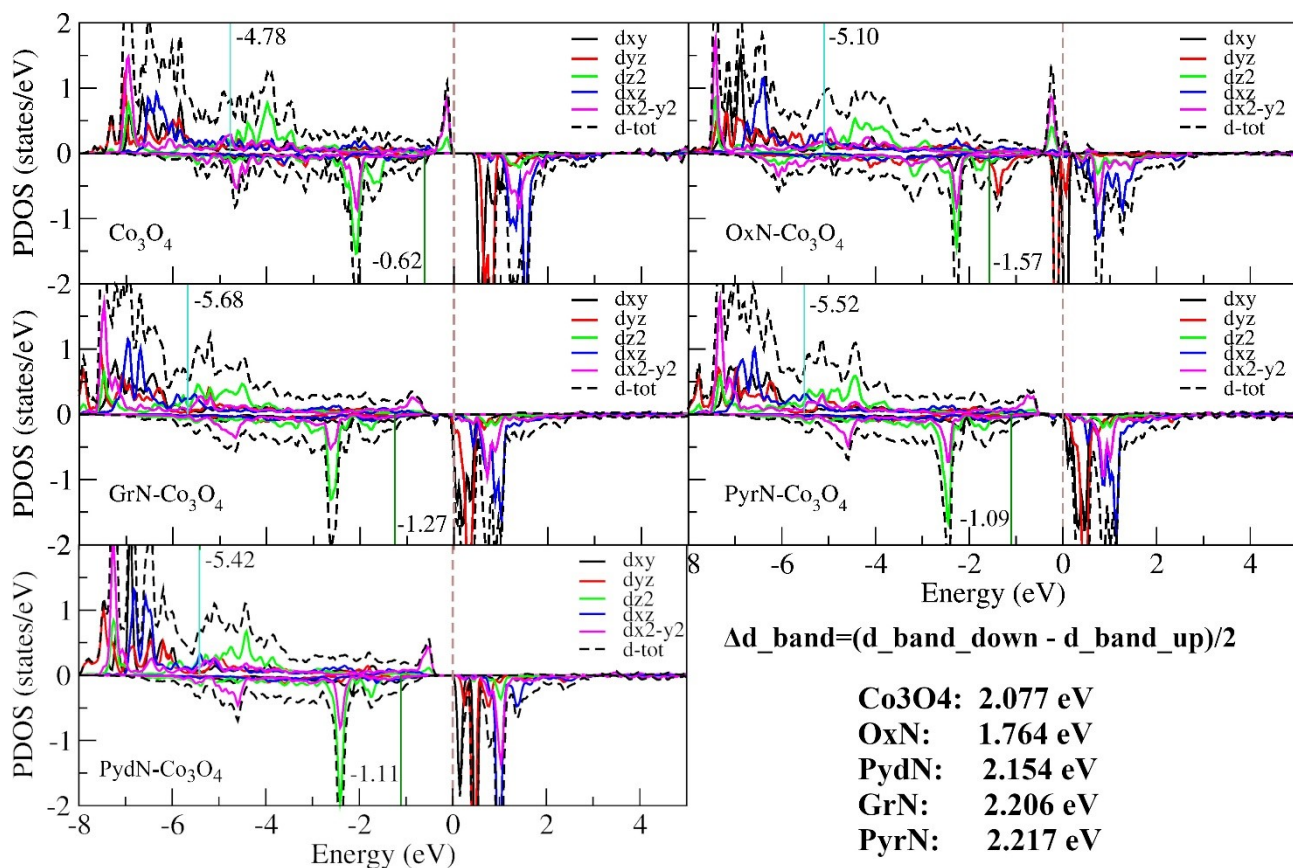

**Fig. S18** Projected density of states (PDOS) of the active Co (orange site in Fig. S13) for (a) pure  $\text{Co}_3\text{O}_4(110)$ , (b) Oxidized N, (c) Graphitic N, (d) Pyrrolic N and (e) Pyridinic N carbonaceous components covered  $\text{Co}_3\text{O}_4$ . The d\_band of spin-up and spin-down are marked by turquoise and green vertical line, respectively. We defined the difference of d\_band ( $\Delta d\_band$ ) between these two spin channels as: half of d\_band(down) minus d\_band(up).

**Table S1** Calculated Gibbs energies of O<sub>2</sub>, H<sub>2</sub>, H<sub>2</sub>O and OH. where G<sub>O2</sub> are evaluated as G<sub>O2</sub> = 2 \*

$$(G_{\text{H}_2\text{O}} - G_{\text{H}_2}) + 4.92$$

|                  | E       | TS    | ZPE   | G       | G-reference <sup>a</sup> |
|------------------|---------|-------|-------|---------|--------------------------|
| O <sub>2</sub>   | /       | /     | /     | -9.705  | -9.717                   |
| H <sub>2</sub>   | -6.771  | 0.316 | 0.279 | -6.808  | -6.807                   |
| H <sub>2</sub> O | -14.213 | 0.483 | 0.575 | -14.121 | -14.126                  |

a. from ref<sup>1</sup>**Table S2** Performance parameters for different electrocatalysts for OER in strong acidic electrolytes.

| Catalysts                                              | j (mA cm <sup>-2</sup> ) | η (mV) | Electrolyte                          |
|--------------------------------------------------------|--------------------------|--------|--------------------------------------|
| Co <sub>3</sub> O <sub>4</sub> @C/CP <sup>2</sup>      | 10                       | 370    | 0.5 M H <sub>2</sub> SO <sub>4</sub> |
| Co <sub>3</sub> O <sub>4</sub> @C/GPO <sup>3</sup>     | 10                       | 356    | 1 M H <sub>2</sub> SO <sub>4</sub>   |
| Co <sub>3</sub> O <sub>4</sub> /GC <sup>4</sup>        | 10                       | 470    | 0.5 M H <sub>2</sub> SO <sub>4</sub> |
| Co <sub>3</sub> O <sub>4</sub> /FTO <sup>5</sup>       | 10                       | 570    | 0.5 M H <sub>2</sub> SO <sub>4</sub> |
| Fe- Co <sub>3</sub> O <sub>4</sub> @C/FTO <sup>6</sup> | 10                       | 396    | 0.5 M H <sub>2</sub> SO <sub>4</sub> |
| [Co-Fe-Pb]Ox <sup>7</sup>                              | 10                       | 560±10 | 0.5 M H <sub>2</sub> SO <sub>4</sub> |
| Co <sub>0.05</sub> Fe <sub>0.95</sub> Oy <sup>8</sup>  | 10                       | 650    | 0.5 M H <sub>2</sub> SO <sub>4</sub> |
| Co <sub>2</sub> TiO <sub>4</sub> <sup>9</sup>          | 10                       | 513    | 0.5 M H <sub>2</sub> SO <sub>4</sub> |
| Ag-Co/FTO <sup>10</sup>                                | 10                       | 370    | 0.5 M H <sub>2</sub> SO <sub>4</sub> |
| Fe <sub>2</sub> O <sub>3</sub> <sup>11</sup>           | 10                       | 650    | 0.5 M H <sub>2</sub> SO <sub>4</sub> |
| LaMn@NCo-ZIF <sup>12</sup>                             | 10                       | 353    | 0.1M HClO <sub>4</sub>               |
| Co <sub>3</sub> O <sub>4</sub> /CP (This work)         | 10                       | 365    | 1 M H <sub>2</sub> SO <sub>4</sub>   |
| Co <sub>3</sub> O <sub>4</sub> @NC/CP (This work)      | 10                       | 330    | 1M H <sub>2</sub> SO <sub>4</sub>    |



**Table S3** Bader charges ( $e$ ) of carbonaceous component (CC) and the  $\text{Co}_3\text{O}_4$  component. The positive value means electrons gained; and the negative one means losing electrons.

|                         | C      | O(C) <sup>a</sup> | N     | H      | sum(CC) | Co      | O( $\text{Co}_3\text{O}_4$ ) <sup>b</sup> | sum( $\text{Co}_3\text{O}_4$ ) |
|-------------------------|--------|-------------------|-------|--------|---------|---------|-------------------------------------------|--------------------------------|
| $\text{Co}_3\text{O}_4$ | /      | /                 | /     | /      | /       | -52.858 | 52.793                                    | -0.0655 <sup>c</sup>           |
| OxN                     | -0.720 | 0.589             | 0.584 | -0.748 | -0.295  | -52.497 | 52.725                                    | 0.228                          |
| PydN                    | -1.040 | /                 | 1.203 | -0.619 | -0.456  | -52.525 | 52.914                                    | 0.389                          |
| GrN                     | -1.012 | /                 | 1.193 | -0.847 | -0.666  | -52.432 | 53.031                                    | 0.599                          |
| PyrN                    | -0.604 | /                 | 1.133 | -1.082 | -0.553  | -52.508 | 52.993                                    | 0.485                          |

a. Oxygen of carbonaceous component; b. oxygen of  $\text{Co}_3\text{O}_4$  component; c. not equal to 0 because the symmetric model is nonstoichiometric and arises from the error of calculations. However, the relative charges are more meaningful.

## References

- 1 Y. Zhou and N. López, *ACS Catal.*, 2020, **10**, 6254–6261.
- 2 X. Yang, H. Li, A.-Y. Lu, S. Min, Z. Idriss, M. N. Hedhili, K.-W. Huang, H. Idriss and L.-J. Li, *Nano Energy*, 2016, **25**, 42–50.
- 3 J. Yu, F. A. Garcés-Pineda, J. González-Cobos, M. Peña-Díaz, C. Rogero, S. Giménez, M. C. Spadaro, J. Arbiol, S. Barja and J. R. Galán-Mascarós, *Nat Commun*, 2022, **13**, 4341.
- 4 K.-L. Yan, J.-F. Qin, J.-H. Lin, B. Dong, J.-Q. Chi, Z.-Z. Liu, F.-N. Dai, Y.-M. Chai and C.-G. Liu, *J. Mater. Chem. A*, 2018, **6**, 5678–5686.
- 5 J. S. Mondschein, J. F. Callejas, C. G. Read, J. Y. C. Chen, C. F. Holder, C. K. Badding and R. E. Schaak, *Chem. Mater.*, 2017, **29**, 950–957.
- 6 D. Senthil Raja, P.-Y. Cheng, C.-C. Cheng, S.-Q. Chang, C.-L. Huang and S.-Y. Lu, *Applied Catalysis B: Environmental*, 2022, **303**, 120899.
- 7 D. Simondson, M. Chatti, S. A. Bonke, M. F. Tesch, R. Golnak, J. Xiao, D. A. Hoogeveen, P. Cherepanov, J. L. Gardiner, A. Tricoli, D. R. MacFarlane and A. N. Simonov, *Angewandte Chemie International Edition*, 8.
- 8 M. R. Cerón, M. Izquierdo, N. Alegret, J. A. Valdez, A. Rodríguez-Fortea, M. M. Olmstead, A. L. Balch, J. M. Poblet and L. Echegoyen, *Chem. Commun.*, 2016, **52**, 64–67.
- 9 S. Anantharaj, K. Karthick and S. Kundu, *Inorg. Chem.*, 2019, **58**, 8570–8576.
- 10 K.-L. Yan, J.-Q. Chi, J.-Y. Xie, B. Dong, Z.-Z. Liu, W.-K. Gao, J.-H. Lin, Y.-M. Chai and C.-G. Liu, *Renewable Energy*, 2018, **119**, 54–61.
- 11 W. L. Kwong, C. C. Lee, A. Shchukarev, E. Björn and J. Messinger, *Journal of Catalysis*, 2018, **365**, 29–35.
- 12 L. Chong, G. Gao, J. Wen, H. Li, H. Xu, Z. Green, J. D. Sugar, A. J. Kropf, W. Xu, X.-M. Lin, H. Xu, L.-W. Wang and D.-J. Liu, *Science*, 2023, **380**, 609–616.
